# Supplementary material for: Integrated spatial multiplexing of heralded single-photon sources
Source: PubMed Central journal article supplement — Nat Commun. 2013 Oct 10;4:2582. doi: 10.1038/ncomms3582 (PMC3826656; doi:10.1038/ncomms3582), 2013-10-10
Supplement: ncomms3582-s1.pdf [file ncomms3582-s1.pdf]

## Supplementary Information for “Integrated spatial multiplexing of heralded single photon sources”

M. J. Collins<sup>1</sup>, C. Xiong<sup>1</sup>, I. H. Rey<sup>2</sup>, T. D. Vo<sup>1,3</sup>, J. He<sup>1</sup>, S. Shahnian<sup>1</sup>, C. Reardon<sup>4</sup>,  
T. F. Krauss<sup>2,4</sup>, M. J. Steel<sup>5</sup>, A. S. Clark<sup>1</sup>, and B. J. Eggleton<sup>1,\*</sup>

<sup>1</sup>Centre for Ultrahigh bandwidth Devices for Optical Systems (CUDOS), the Institute of Photonics and Optical Science (IPOS), School of Physics, University of Sydney, NSW 2006, Australia

<sup>2</sup>SUPA, School of Physics and Astronomy, University of St. Andrews, St. Andrews, Fife KY16 9SS, United Kingdom

<sup>3</sup>Maritime Division, Defence Science and Technology Organisation (DSTO), Department of Defence, P.O. Box 44, Pyrmont, NSW 2009, Australia

<sup>4</sup>Department of Physics, University of York, York YO10 5DD, United Kingdom

<sup>5</sup>CUDOS, MQ Photonics Research Centre, Department of Physics and Astronomy, Macquarie University, NSW 2019, Australia

\*email: [egg@physics.usyd.edu.au](mailto:egg@physics.usyd.edu.au)

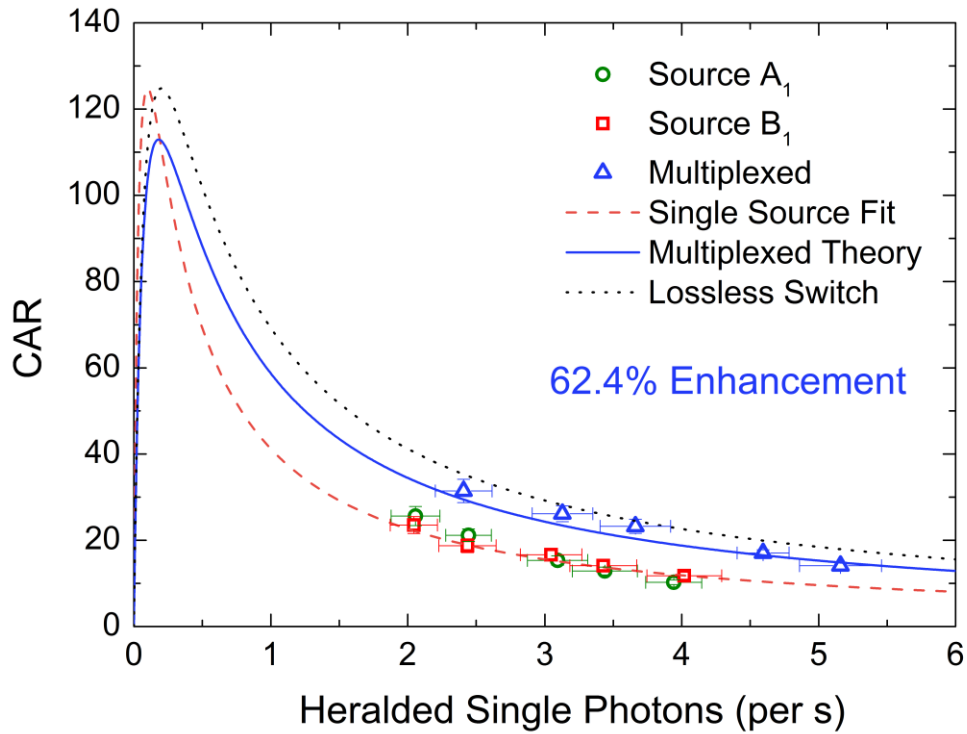

**Supplementary Figure S1 | Plot of the experimental data for the separately pumped PhCW experiment showing CAR versus heralded single photon rate.** The single source data is shown as red squares and green circles and fitted with a dashed red line. The multiplexed data is shown as blue triangles, fitted with a solid blue line. The theoretical lossless switch case is shown as a black dotted line. Error bars are derived from Poissonian statistics.

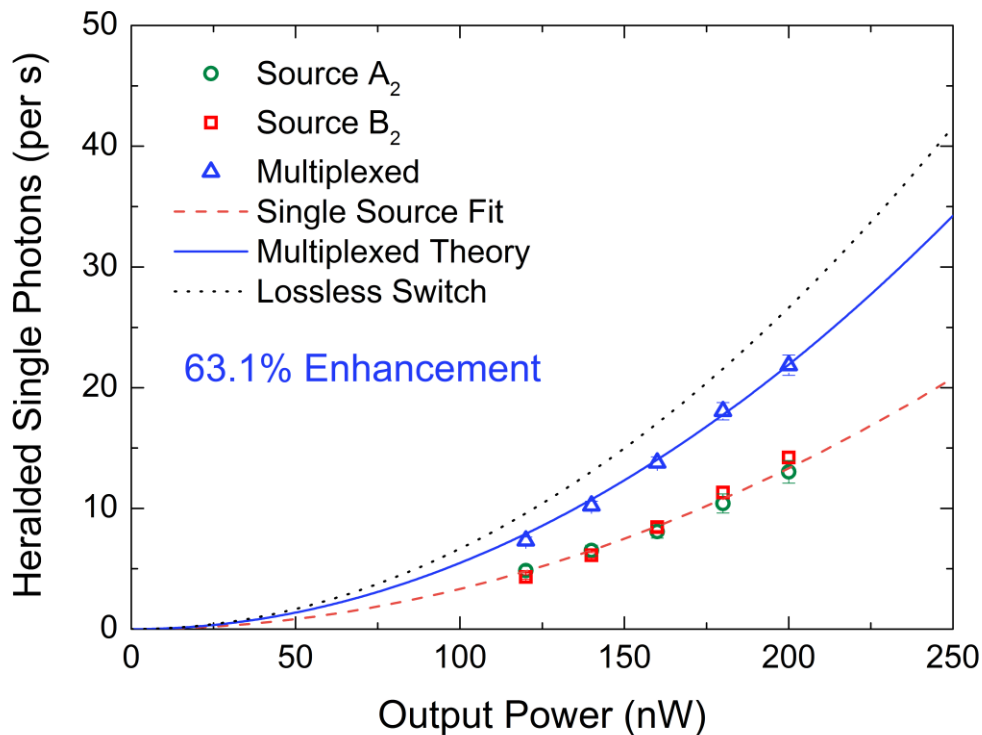

**Supplementary Figure S2 | Plot of the experimental data for the Y-split device showing heralded single photon rate versus output power.** Again, the single source data is shown as red squares and green circles, fitted with a red dashed line. The multiplexed data is shown as blue triangles fitted with a solid blue line. The theoretical lossless switch case shown as a black dotted line. Error bars are derived from Poissonian statistics.

| Waveguide A       |                        |         |           |                   |                    |      |      |          |       |         |
|-------------------|------------------------|---------|-----------|-------------------|--------------------|------|------|----------|-------|---------|
| Time/s            | $C_{\text{raw}}$ total | A total | A total/6 | $C_{\text{true}}$ | $C_{\text{raw}}/s$ | A /s | C /s | Err C /s | CAR   | Err CAR |
| 480               | 2077                   | 1110    | 185.00    | 1892.00           | 4.33               | 0.39 | 3.94 | 0.20     | 10.23 | 0.53    |
| 360               | 1334                   | 577     | 96.17     | 1237.83           | 3.71               | 0.27 | 3.44 | 0.24     | 12.87 | 0.89    |
| 420               | 1384                   | 509     | 84.83     | 1299.17           | 3.30               | 0.20 | 3.09 | 0.22     | 15.31 | 1.09    |
| 720               | 1843                   | 499     | 83.17     | 1759.83           | 2.56               | 0.12 | 2.44 | 0.17     | 21.16 | 1.44    |
| 600               | 1282                   | 289     | 48.17     | 1233.83           | 2.14               | 0.08 | 2.06 | 0.18     | 25.62 | 2.22    |
| Waveguide B       |                        |         |           |                   |                    |      |      |          |       |         |
| Time/s            | $C_{\text{raw}}$ total | A total | A total/6 | $C_{\text{true}}$ | $C_{\text{raw}}/s$ | A /s | C /s | Err C /s | CAR   | Err CAR |
| 600               | 1279                   | 313     | 52.17     | 1226.83           | 2.13               | 0.09 | 2.04 | 0.17     | 23.52 | 1.99    |
| 420               | 1078                   | 328     | 54.67     | 1023.33           | 2.57               | 0.13 | 2.44 | 0.21     | 18.72 | 1.60    |
| 420               | 1356                   | 461     | 76.83     | 1279.17           | 3.23               | 0.18 | 3.05 | 0.22     | 16.65 | 1.23    |
| 360               | 1321                   | 525     | 87.50     | 1233.50           | 3.67               | 0.24 | 3.43 | 0.24     | 14.10 | 1.00    |
| 300               | 1308                   | 615     | 102.50    | 1205.50           | 4.36               | 0.34 | 4.02 | 0.27     | 11.76 | 0.80    |
| Multiplexed A + B |                        |         |           |                   |                    |      |      |          |       |         |
| Time/s            | $C_{\text{raw}}$ total | A total | A total/6 | $C_{\text{true}}$ | $C_{\text{raw}}/s$ | A /s | C /s | Err C /s | CAR   | Err CAR |
| 360               | 1989                   | 790     | 131.67    | 1857.33           | 5.53               | 0.37 | 5.16 | 0.30     | 14.11 | 0.82    |
| 900               | 4377                   | 1454    | 242.33    | 4134.67           | 4.86               | 0.27 | 4.59 | 0.19     | 17.06 | 0.71    |
| 480               | 1833                   | 454     | 75.67     | 1757.33           | 3.82               | 0.16 | 3.66 | 0.26     | 23.22 | 1.63    |
| 600               | 1949                   | 431     | 71.83     | 1877.17           | 3.25               | 0.12 | 3.13 | 0.22     | 26.13 | 1.85    |
| 600               | 1491                   | 276     | 46.00     | 1445.00           | 2.49               | 0.08 | 2.41 | 0.21     | 31.41 | 2.70    |

**Supplementary Table S1 | Complete data for the multiplexing of two separate sources.** Data for Waveguide A, B and the multiplexed case A + B are shown. These include integration times, total counts in the main coincidence peak, counts in 6 accidental peaks, the average accidental peak, the number of true coincidence counts from SFWM (C-A), the raw counts, accidental and true counts per second, the error in the true counts calculated from Poissonian statistics, the CAR and the error in the CAR, again calculated from Poissonian statistics.

| $g^{(2)}(nT) = (C_H C_{ABH}) / (C_{AH} C_{BH})$ |                      | n        |          |          |          |          |
|-------------------------------------------------|----------------------|----------|----------|----------|----------|----------|
|                                                 |                      | -2       | -1       | 0        | +1       | +2       |
| 3-fold Coincidence                              | $C_{ABH}$            | 19       | 18       | 46       | 20       | 19       |
| Coincidence Delayed                             | $C_{AH}$             | 19475    | 23096    | 280840   | 23213    | 23281    |
| Coincidence Fixed                               | $C_{BH}$             | 544832   | 544832   | 544832   | 544832   | 544832   |
| Heralds                                         | $C_H$                | 5.78E+08 | 5.78E+08 | 5.78E+08 | 5.78E+08 | 5.78E+08 |
| $g^{(2)}(nT)$                                   | $g^{(2)}(nT)$        | 1.13759  | 0.908752 | 0.190989 | 1.004635 | 0.951616 |
| Error $g^{(2)}(nT)$                             | Err[ $g^{(2)}(nT)$ ] | 0.260981 | 0.214195 | 0.02816  | 0.224643 | 0.218316 |

**Supplementary Table S2 | Complete data for the correlation function measurement of the multiplexed stream of photons.** Data is shown for  $g^{(2)}(nT)$  where  $T$  is the pulse period of the laser and  $n$  is integer number of pulse periods delayed for one detector. To calculate this one requires the three-fold coincidences  $C_{ABH}$  from the herald (H) and the detectors after the 50:50 coupler (A and B), the heralded counts after the 50:50 coupler  $C_{AH}$  and  $C_{BH}$  and the number of heralding clicks  $C_H$ . The error is calculated from Poissonian statistics. All data was taken for 7 hours in total.
